# Supplementary material for: Organic fertilization improves soil aggregation through increases in abundance of eubacteria and products of arbuscular mycorrhizal fungi
Source: PubMed Central journal article supplement (PMC8206353; doi:10.1038/s41598-021-91653-x), 2021-06-15
Supplement: 41598_2021_91653_MOESM1_ESM.pdf [file 41598_2021_91653_MOESM1_ESM.pdf]

## ***Supplementary Material***

### **Organic fertilization improves soil aggregation through increases in abundance of eubacteria and products of arbuscular mycorrhizal fungi**

Veronika Řezáčová<sup>\*1</sup>, Alena Czakó<sup>1</sup>, Martin Stehlík<sup>1</sup>, Markéta Mayerová<sup>1</sup>, Tomáš Šimon<sup>1</sup>, Michaela Smatanová<sup>2</sup>, Mikuláš Madaras<sup>1</sup>

<sup>1</sup>Crop Research Institute, Drnovská 507, Prague 6, Czech Republic

<sup>2</sup>Central Institute for Testing and Supervising in Agriculture, Hroznová 63, Brno, Czech Republic

\*Author for correspondence:

Veronika Řezáčová; Tel: +420 233 022 273; email: rezacova@vurv.cz; ORCID: 0000-0002-1749-0355

**Table S1** The composition of the used organic fertilizers. Doses of PK fertilizers approximated local recommendations.

|              | Dry biomass (%) | C:N  | Total N (%) | Combustible substances (%) | P (%) | K (%) |
|--------------|-----------------|------|-------------|----------------------------|-------|-------|
| Compost      | 32.2            | 11.4 | 1.30        | 29.7                       | 1.37  | 1.64  |
| Digestate I  | 6.1             | 6.2  | 6.38        | 77.8                       | 1.25  | 4.52  |
| Digestate II | 5.4             | 3.8  | 9.67        | 71.5                       | 1.11  | 8.00  |

**Fig. S1** Experimental design.

Numbers indicate various treatments, among them 1) mixture of ammonium nitrate and finely ground limestone (LAV, Lovochemie as, 27% N), 2) digestate I (corn silage, cattle slurry), 3) digestate II (corn silage, pig slurry, barnyard manure, hay), 4) compost, and 5) unfertilized control. Ja, Li and Sv are the designations of three different localities. For operational reasons, typical randomization was not used. For easy application of organic fertilizers, the plots are placed one behind the other in a belt. Protective lanes surround each of the plots to eliminate the influence of neighboring plots.

|    |   |   |   |   |   |
|----|---|---|---|---|---|
| Sv | 1 | 2 | 3 | 4 | 5 |
|    | 2 | 1 | 3 | 4 | 5 |
| Li | 1 | 2 | 3 | 4 | 5 |
|    | 2 | 1 | 3 | 4 | 5 |
| Ja | 1 | 2 | 3 | 4 | 5 |
|    | 2 | 1 | 3 | 4 | 5 |

**Fig. S2** Ordination diagram showing results of redundancy analysis testing the prediction capacity of the type of fertilizer on the assessed soil parameters. The angle between predictor arrow and particular soil parameter arrow approximates the linear correlation between the two variables (proportional to the cosine of the angle). The first (horizontal) axis explains 20.2 % of the total variation in soil parameters, the second axis explains 20.9 % of the total variation. Arbuscular mycorrhizal fungi (AMF); functional groups (FG); hot water extractable carbon (HWC); easily extractable glomalins (EE glomalin); SOC (soil organic carbon) lability

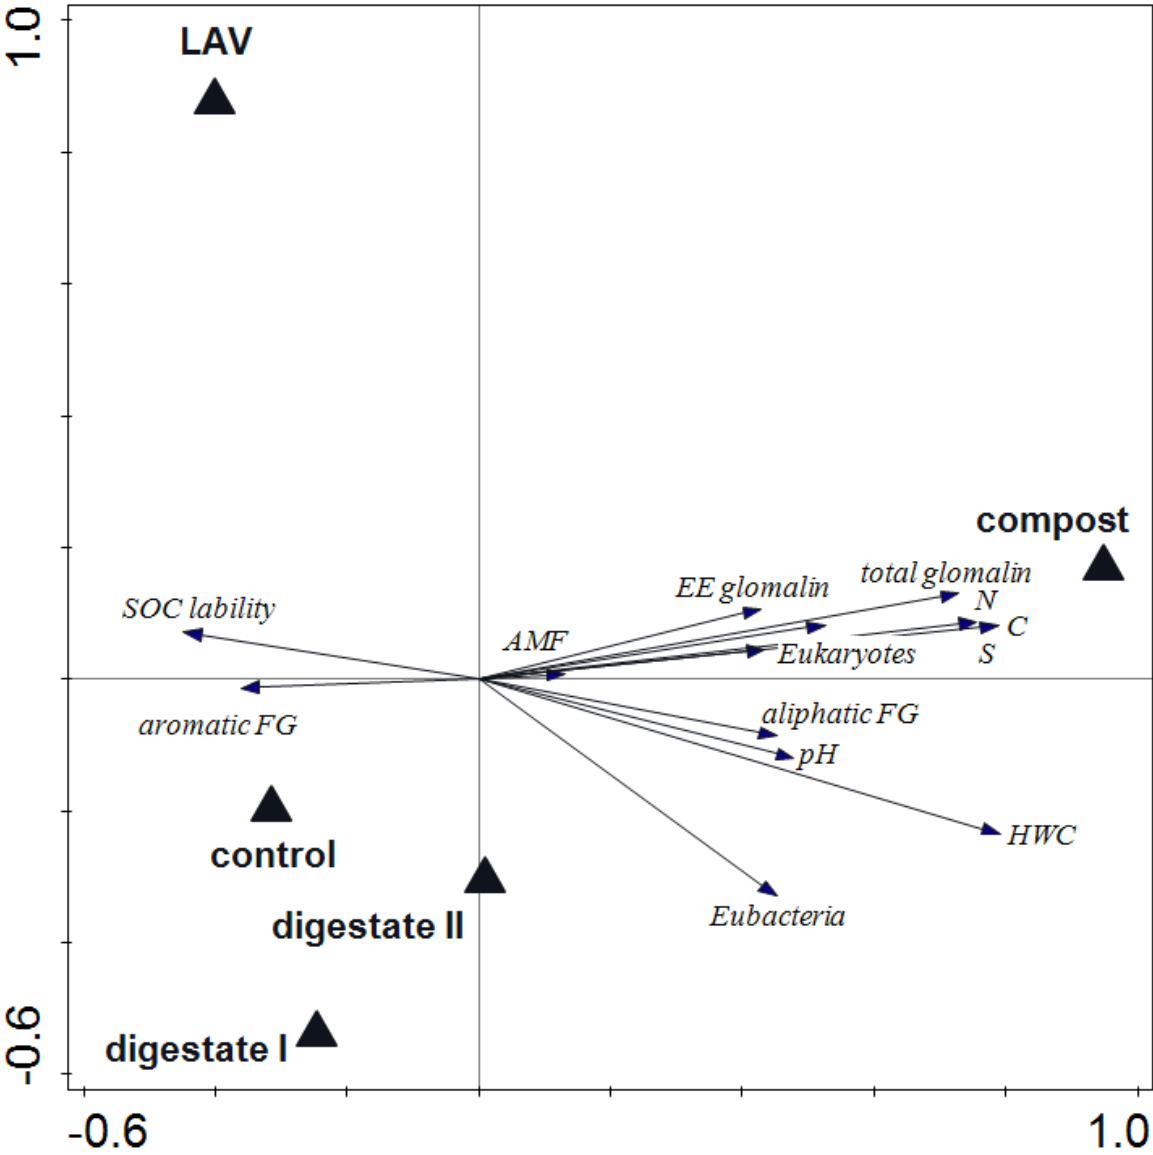

**Fig. S3** T-value biplot for the relationships between the soil parameters and the digestate II application. The arrows fully falling within a Van Dobben circle (solid line) indicate a significant positive ( $P < 0.05$ ) relationship between a soil parameter and the predictor. Not all soil parameters located outside the circles are displayed, although they were included in the analysis. Hot water extractable carbon (HWC)

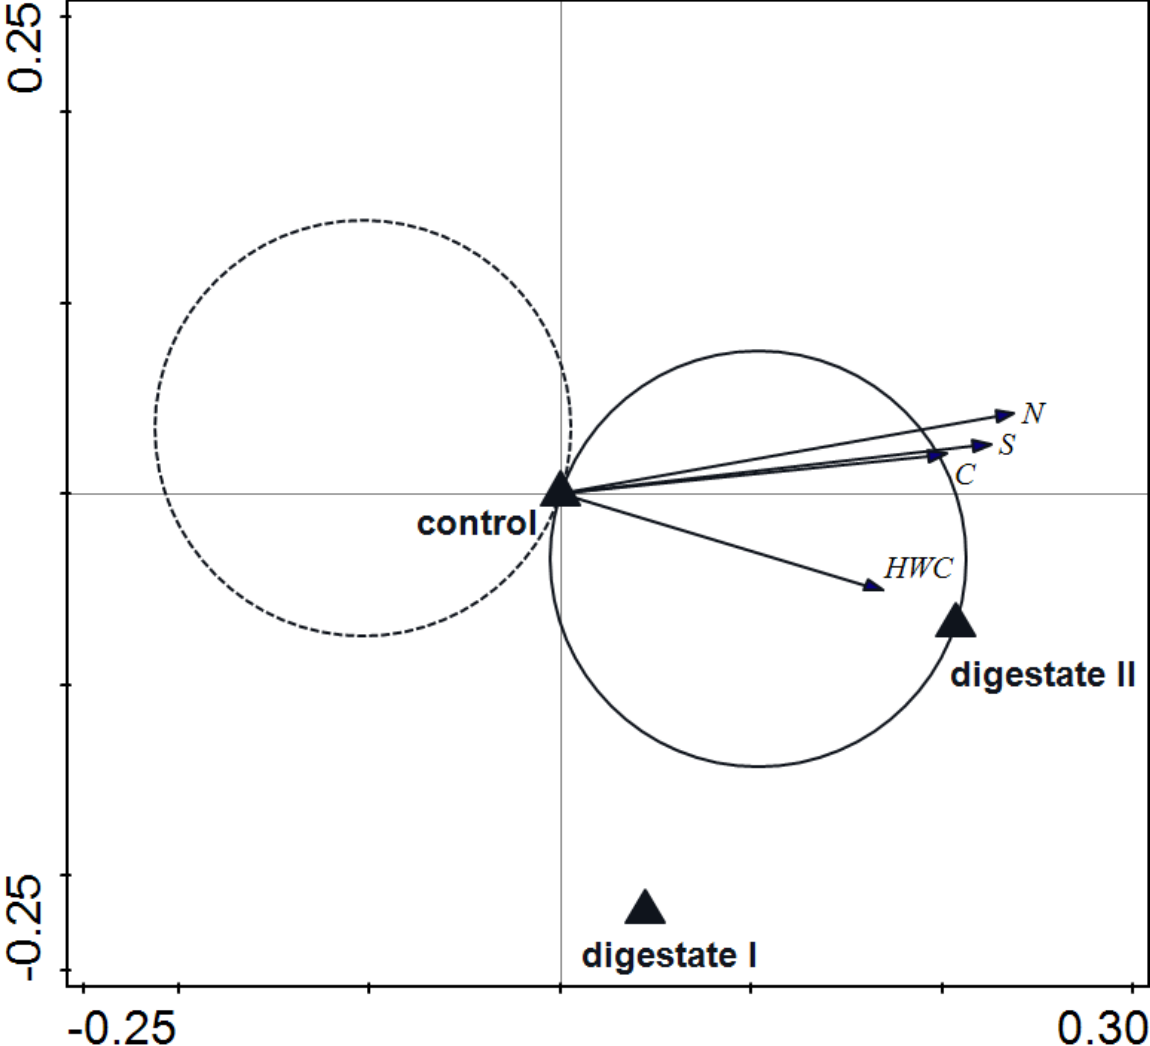

**Fig. S4** T-value biplot for the relationships between the soil parameters and the stability of soil aggregates. The arrows fully falling within a Van Dobben circle indicate a significant positive ( $P < 0.05$ ) relationship between the values of a soil parameter and the respective predictor. Not all soil parameters located outside the circles are displayed, although they were included in the analysis. functional groups (FG); hot water extractable carbon (HWC); easily extractable glomalins (EE glomalin); SOC (soil organic carbon) lability

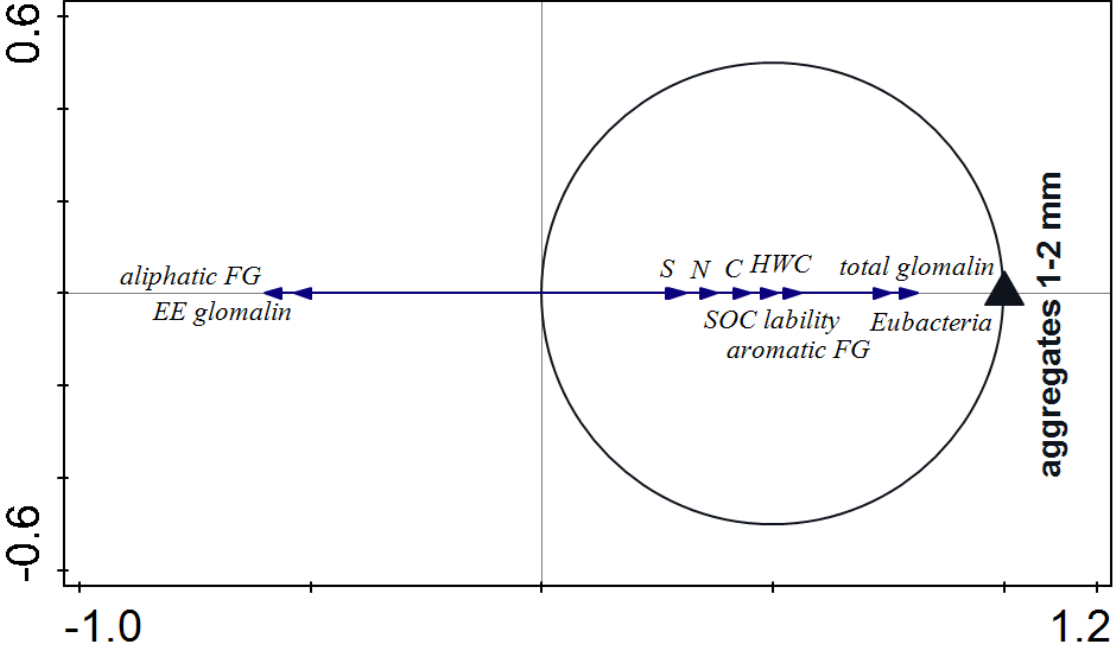

**Table S2.** Raw data table. Characteristics of the examined field soil samples; percentages of water stable of 1–2 mm soil aggregates; count numbers of eukaryotes including protists, arbuscular mycorrhizal fungi and eubacteria as assessed by real-time PCR; abundance of total glomalin; easily extractable glomalin; concentrations of total organic C, N, and S, and hot water extractable C; aliphatic and aromatic functional groups of soil organic matter, and soil organic C lability assessed using analysis of mid-infrared peaks obtained from Fourier transform infrared (FTIR) spectroscopy and pH measured in aqueous soil suspension.

Article title: *Organic fertilization improves soil aggregation through increases in abundance of eubacteria and products of arbuscular mycorrhizal fungi*

Authors: Veronika Režáčková\*, Alena Czákó, Martin Stehlik, Markéta Mayerová, Tomáš Šimon, Michaela Smatanová, Mikuláš Madaras

| Sample no. | Locality                | Type of fertilizer | Stability of soil aggregates 1-2 mm (%) | Eukaryotes incl. protists (CN/1 g) | Arbuscular mycorrhizal fungi (CN/1 g) | Eubacteria (CN/1g) | Total glomalin (mg/g) | Easily extractable glomalin (mg/g) | pH   | N (%) | C (%) | S (%) | Hot water extractable C (mg C/g) | Aliphatic functional groups of soil organic matter | Aromatic functional groups of soil organic matter | Soil organic C lability |
|------------|-------------------------|--------------------|-----------------------------------------|------------------------------------|---------------------------------------|--------------------|-----------------------|------------------------------------|------|-------|-------|-------|----------------------------------|----------------------------------------------------|---------------------------------------------------|-------------------------|
| 1          | Jaroměřice nad Rokytkou | control            | 29.08892                                | 7923540536                         | 393556711                             | 59146880786        | 1.8545                | 0.527                              | 7.1  | 0.124 | 1.27  | 0.021 | 0.304688                         | 0.765333                                           | 3.869666667                                       | 5.094552                |
| 2          | Jaroměřice nad Rokytkou | control            | 31.82768                                | 6893163638                         | 350667253                             | 65788335796        | 1.8265                | 0.466333                           | 6.74 | 0.127 | 1.305 | 0.021 | 0.332262                         | 0.690667                                           | 3.789333333                                       | 5.55437                 |
| 3          | Jaroměřice nad Rokytkou | control            | 29.74424                                | 10829631594                        | 1.502E+09                             | 60555174941        | 1.8765                | 0.518                              | 6.65 | 0.128 | 1.261 | 0.021 | 0.327437                         | 1.043667                                           | 3.794666667                                       | 3.633174                |
| 4          | Jaroměřice nad Rokytkou | control            | 32.45993                                | 6299383952                         | 3.741E+09                             | 59685061030        | 1.0675                | 0.389667                           | 6.64 | 0.12  | 1.205 | 0.02  | 0.306756                         | 0.425333                                           | 4.029333333                                       | 10.19939                |
| 5          | Jaroměřice nad Rokytkou | LAV                | 31.87349                                | 14885881945                        | 4.131E+09                             | 45046620071        | 1.8135                | 0.486667                           | 6.3  | 0.14  | 1.356 | 0.022 | 0.283319                         | 0.859                                              | 4.217                                             | 4.909328                |
| 6          | Jaroměřice nad Rokytkou | LAV                | 29.79355                                | 10683397953                        | 1.33E+09                              | 59995451743        | 2.0885                | 0.48                               | 6.3  | 0.137 | 1.336 | 0.022 | 0.295038                         | 0.613667                                           | 3.803                                             | 6.205785                |
| 7          | Jaroměřice nad Rokytkou | LAV                | 32.32132                                | 5904773215                         | 2.672E+09                             | 65074460153        | 1.851                 | 0.408667                           | 6.4  | 0.14  | 1.273 | 0.022 | 0.304688                         | 0.506333                                           | 3.982                                             | 8.363446                |
| 8          | Jaroměřice nad Rokytkou | LAV                | 33.04233                                | 4626869675                         | 705760947                             | 61441792000        | 1.843                 | 0.438                              | 6.3  | 0.135 | 1.248 | 0.022 | 0.278493                         | 0.586333                                           | 4.165333333                                       | 7.117395                |
| 9          | Jaroměřice nad Rokytkou | digestate I        | 39.51895                                | 9199543316                         | 2.19E+09                              | 68814739236        | 1.914                 | 0.442                              | 5.65 | 0.129 | 1.281 | 0.022 | 0.360525                         | 0.657                                              | 4.143666667                                       | 6.313574                |
| 10         | Jaroměřice nad Rokytkou | digestate I        | 48.13951                                | 6839833870                         | 1.893E+09                             | 70848688503        | 1.5835                | 0.407333                           | 6.64 | 0.134 | 1.327 | 0.023 | 0.392234                         | 0.616333                                           | 4.107666667                                       | 6.680984                |
| 11         | Jaroměřice nad Rokytkou | digestate I        | 55.21801                                | 8863626065                         | 233590779                             | 86342664921        | 1.5045                | 0.419667                           | 6.9  | 0.129 | 1.29  | 0.023 | 0.331573                         | 0.625333                                           | 4.243                                             | 6.821615                |
| 12         | Jaroměřice nad Rokytkou | digestate I        | 47.2826                                 | 8364467241                         | 1.199E+09                             | 83364407949        | 1.2025                | 0.404667                           | 6.77 | 0.128 | 1.264 | 0.023 | 0.334333                         | 0.765333                                           | 4.015                                             | 5.284245                |
| 13         | Jaroměřice nad Rokytkou | digestate II       | 44.4493                                 | 6717300371                         | 5.854E+09                             | 62746070534        | 2.174                 | 0.430333                           | 6.8  | 0.138 | 1.346 | 0.023 | 0.390856                         | 0.570333                                           | 3.811333333                                       | 6.778698                |
| 14         | Jaroměřice nad Rokytkou | digestate II       | 46.45111                                | 4940497049                         | 3.558E+09                             | 72948160232        | 1.551                 | 0.419667                           | 6.9  | 0.146 | 1.398 | 0.025 | 0.360525                         | 0.363667                                           | 3.721                                             | 10.58146                |
| 15         | Jaroměřice nad Rokytkou | digestate II       | 49.58203                                | 10203746362                        | 3.797E+09                             | 63495539229        | 2.002                 | 0.385                              | 6.95 | 0.141 | 1.322 | 0.024 | 0.381205                         | 1.108333                                           | 3.812666667                                       | 3.463348                |
| 16         | Jaroměřice nad Rokytkou | digestate II       | 56.65179                                | 16635843979                        | 1.01E+09                              | 54278074186        | 1.32                  | 0.375333                           | 6.8  | 0.13  | 1.233 | 0.023 | 0.363972                         | 0.353333                                           | 3.936333333                                       | 12.27666                |
| 17         | Jaroměřice nad Rokytkou | compost            | 41.77645                                | 7044639291                         | 760504613                             | 71758718186        | 1.879                 | 0.470667                           | 7.2  | 0.205 | 2.181 | 0.029 | 0.530792                         | 1.435667                                           | 3.519                                             | 2.463122                |
| 18         | Jaroměřice nad Rokytkou | compost            | 46.60596                                | 23590284228                        | 2.241E+09                             | 76040793668        | 3.0475                | 0.482333                           | 7.19 | 0.202 | 2.176 | 0.044 | 0.532117                         | 1.234333                                           | 3.549333333                                       | 2.894134                |
| 19         | Jaroměřice nad Rokytkou | compost            | 51.48735                                | 10521059796                        | 3.162E+09                             | 66982966456        | 1.7295                | 0.495667                           | 7.4  | 0.282 | 3.131 | 0.037 | 0.497703                         | 1.051667                                           | 3.603333333                                       | 3.483419                |
| 20         | Jaroměřice nad Rokytkou | compost            | 50.75694                                | 7387929674                         | 370636344                             | 75198949021        | 2.42                  | 0.501667                           | 7.43 | 0.227 | 2.423 | 0.032 | 0.541821                         | 1.397                                              | 3.646                                             | 2.609885                |
| 21         | Lipa                    | control            | 23.46958                                | 6372208057                         | 294502584                             | 86428316127        | 1.0345                | 0.647667                           | 6.4  | 0.104 | 1.149 | 0.018 | 0.300351                         | 1.049                                              | 3.393666667                                       | 3.253609                |
| 22         | Lipa                    | control            | 15.28709                                | 4749055439                         | 954271839                             | 64975108804        | 0.905                 | 0.660333                           | 5.98 | 0.097 | 0.992 | 0.016 | 0.297547                         | 1.010333                                           | 3.452                                             | 3.479568                |
| 23         | Lipa                    | control            | 17.03063                                | 10664333335                        | 1.753E+09                             | 73371006816        | 0.7225                | 0.625667                           | 5.97 | 0.103 | 1.053 | 0.017 | 0.302453                         | 0.922333                                           | 3.635666667                                       | 4.057435                |
| 24         | Lipa                    | control            | 18.16029                                | 10927885699                        | 204290455                             | 61054936368        | 1.4435                | 0.638667                           | 6.03 | 0.117 | 1.117 | 0.018 | 0.326902                         | 1.000667                                           | 3.165333333                                       | 3.285748                |
| 25         | Lipa                    | LAV                | 21.2744                                 | 7648440289                         | 2.587E+09                             | 69213626299        | 1.4445                | 0.676667                           | 6.2  | 0.105 | 1.122 | 0.02  | 0.284229                         | 1.087                                              | 3.166                                             | 2.935669                |
| 26         | Lipa                    | LAV                | 19.39009                                | 9738279344                         | 511599646                             | 48302646643        | 0.8715                | 0.609667                           | 6.6  | 0.103 | 1.06  | 0.018 | 0.273715                         | 0.979667                                           | 3.206                                             | 3.287737                |
| 27         | Lipa                    | LAV                | 15.76016                                | 10981091545                        | 975093514                             | 39830998068        | 1.807                 | 0.626333                           | 6.1  | 0.098 | 1.047 | 0.017 | 0.234463                         | 0.992667                                           | 3.547333333                                       | 3.575411                |
| 28         | Lipa                    | LAV                | 27.07723                                | 9921118265                         | 2.526E+09                             | 34179332724        | 1.4065                | 0.554667                           | 5.8  | 0.106 | 1.082 | 0.019 | 0.276519                         | 1.454333                                           | 3.424333333                                       | 2.356246                |
| 29         | Lipa                    | digestate I        | 23.7007                                 | 12254614296                        | 1.28E+09                              | 89992357951        | 1.647                 | 0.626333                           | 6.45 | 0.119 | 1.268 | 0.019 | 0.426519                         | 1.427333                                           | 3.295333333                                       | 2.308366                |
| 30         | Lipa                    | digestate I        | 22.63434                                | 5663695777                         | 1.811E+09                             | 96587395861        | 1.7455                | 0.518333                           | 6.45 | 0.113 | 1.373 | 0.021 | 0.350818                         | 1.214                                              | 3.639666667                                       | 3.930584                |
| 31         | Lipa                    | digestate I        | 23.22009                                | 6566451915                         | 1.059E+09                             | 84918337133        | 0.853                 | 0.546667                           | 6.4  | 0.113 | 1.202 | 0.019 | 0.343809                         | 1.252                                              | 3.519333333                                       | 2.901876                |
| 32         | Lipa                    | digestate I        | 20.61963                                | 6280060055                         | 323047438                             | 81615700788        | 1.5335                | 0.525                              | 6.1  | 0.115 | 1.221 | 0.019 | 0.346612                         | 1.307667                                           | 3.160666667                                       | 2.431339                |
| 33         | Lipa                    | digestate II       | 37.37651                                | 16301319302                        | 1.221E+09                             | 1.01468E+11        | 2.3315                | 0.609                              | 6.25 | 0.13  | 1.368 | 0.021 | 0.39007                          | 1.586667                                           | 3.014                                             | 1.901614                |
| 34         | Lipa                    | digestate II       | 30.27265                                | 16575147638                        | 4.587E+09                             | 91237742537        | 1.9485                | 0.572667                           | 6.45 | 0.125 | 1.331 | 0.02  | 0.379556                         | 1.358667                                           | 3.414333333                                       | 2.52213                 |
| 35         | Lipa                    | digestate II       | 31.70927                                | 13441943675                        | 7.862E+09                             | 69708973568        | 1.1725                | 0.654333                           | 6.35 | 0.125 | 1.295 | 0.02  | 0.366939                         | 1.311667                                           | 3.509                                             | 2.690831                |
| 36         | Lipa                    | digestate II       | 28.93662                                | 16107669794                        | 4.039E+09                             | 1.0623E+11         | 1.7195                | 0.623                              | 6.5  | 0.121 | 1.281 | 0.02  | 0.34521                          | 1.025667                                           | 3.559333333                                       | 3.482828                |
| 37         | Lipa                    | compost            | 27.87536                                | 8954110882                         | 5.501E+09                             | 91152466001        | 1.996                 | 0.745333                           | 6.66 | 0.176 | 2.045 | 0.027 | 0.67465                          | 2.903333                                           | 3.065666667                                       | 1.058173                |
| 38         | Lipa                    | compost            | 28.30374                                | 13794921860                        | 2.676E+09                             | 1.16231E+11        | 1.7345                | 0.945333                           | 7.12 | 0.172 | 1.94  | 0.027 | 0.527454                         | 2.649                                              | 3.307                                             | 1.252233                |
| 39         | Lipa                    | compost            | 31.89801                                | 15466236277                        | 8.984E+09                             | 1.07698E+11        | 1.9485                | 1.093333                           | 7.23 | 0.165 | 1.836 | 0.026 | 0.459463                         | 2.547667                                           | 3.413333333                                       | 1.341679                |
| 40         | Lipa                    | compost            | 27.83962                                | 7313800503                         | 571986264                             | 89099119750        | 1.3905                | 0.984                              | 7.17 | 0.164 | 1.851 | 0.026 | 0.462267                         | 1.351333                                           | 3.705                                             | 2.747646                |
| 41         | Hradec nad Svitavou     | control            | 20.86374                                | 10773167407                        | 2.228E+09                             | 46617931119        | 1.847                 | 0.522333                           | 6.5  | 0.101 | 1.028 | 0.025 | 0.322868                         | 2.043333                                           | 3.149333333                                       | 1.54326                 |
| 42         | Hradec nad Svitavou     | control            | 18.76763                                | 3788895468                         | 1.466E+10                             | 60863500196        | 1.7375                | 0.523333                           | 7.28 | 0.104 | 1.079 | 0.016 | 0.322868                         | 1.755667                                           | 3.334333333                                       | 1.904618                |
| 43         | Hradec nad Svitavou     | control            | 16.55075                                | 4922805262                         | 2.661E+09                             | 54310259767        | 1.2595                | 0.591667                           | 7.38 | 0.101 | 1.012 | 0.016 | 0.290894                         | 1.750333                                           | 3.095                                             | 1.767603                |
| 44         | Hradec nad Svitavou     | control            | 14.22885                                | 6580232265                         | 2.628E+09                             | 51794939688        | 1.6325                | 0.521333                           | 7.35 | 0.101 | 0.995 | 0.016 | 0.276297                         | 1.579333                                           | 3.663                                             | 2.335548                |
| 45         | Hradec nad Svitavou     | LAV                | 19.96127                                | 4167465442                         | 1.635E+09                             | 35507127645        | 0.9385                | 0.612667                           | 7.12 | 0.108 | 1.038 | 0.017 | 0.318698                         | 0.945667                                           | 3.342                                             | 3.556078                |
| 46         | Hradec nad Svitavou     | LAV                | 21.01565                                | 5256468657                         | 175024257                             | 41847776072        | 1.34                  | 0.605333                           | 7.4  | 0.119 | 1.105 | 0.019 | 0.320088                         | 0.990667                                           | 3.373666667                                       | 3.459583                |
| 47         | Hradec nad Svitavou     | LAV                | 17.70904                                | 3627969928                         | 282204893                             | 49508810800        | 1.78                  | 0.509333                           | 7    | 0.119 | 1.068 | 0.018 | 0.296455                         | 1.606667                                           | 3.687666667                                       | 2.305347                |
| 48         | Hradec nad Svitavou     | LAV                | 17.17309                                | 4168708365                         | 2.693E+09                             | 40859651289        | 1.6405                | 0.495                              | 6.55 | 0.106 | 1.003 | 0.017 | 0.276993                         | 0.976333                                           | 3.466666667                                       | 3.612433                |
| 49         | Hradec nad Svitavou     | digestate I        | 25.74209                                | 6489912467                         | 1.175E+09                             | 48698832431        | 1.5455                | 0.648667                           | 7.3  | 0.102 | 1.005 | 0.017 | 0.359708                         | 1.901667                                           | 3.410333333                                       | 1.794825                |
| 50         | Hradec nad Svitavou     | digestate I        | 25.83346                                | 6056654248                         | 2.25E+09                              | 36548482069        | 1.499                 | 0.670667                           | 7.5  | 0.107 | 1.077 | 0.018 | 0.412535                         | 1.850333                                           | 3.423666667                                       | 1.857154                |
| 51         | Hradec nad Svitavou     | digestate I        | 19.19277                                | 5969069444                         | 2.288E+09                             | 36583706185        | 1.7345                | 0.645                              | 7.55 | 0.099 | 1.005 | 0.017 | 0.314527                         | 1.798333                                           | 3.374666667                                       | 1.880556                |
| 52         | Hradec nad Svitavou     | digestate I        | 16.56891                                | 2212486383                         | 275181087                             | 55619544266        | 1.5535                | 0.645                              | 7.18 | 0.105 | 1.052 | 0.018 | 0.318698                         | 2.009333                                           | 3.319666667                                       | 1.653443                |
| 53         | Hradec nad Svitavou     | digestate II       | 30.06667                                | 7517056536                         | 496084650                             | 51010849994        | 1.4635                | 0.537333                           | 7.5  | 0.101 | 1.018 | 0.017 | 0.318698                         | 2.133667                                           | 3.269333333                                       | 1.534151                |
| 54         | Hradec nad Svitavou     | digestate II       | 33.10973                                | 12401997437                        | 189970458                             | 53327230242        | 1.5515                | 0.570667                           | 7.4  | 0.104 | 1.069 | 0.019 | 0.366311                         | 2.335667                                           | 3.182666667                                       | 1.362916                |
| 55         | Hradec nad Svitavou     | digestate II       | 27.66766                                | 16291600093                        | 297100890                             | 32923722780        | 1.766                 | 0.462333                           | 7.3  | 0.107 | 1.076 | 0.019 | 0.361446                         | 1.806                                              | 3.228666667                                       | 1.791791                |
| 56         | Hradec nad Svitavou     | digestate II       | 24.34024                                | 16160665647                        | 731177887                             | 76806644633        | 1.658                 | 0.472667                           | 7.55 | 0.097 | 0.974 | 0.017 | 0.324606                         | 1.883333                                           | 3.199666667                                       | 1.699284                |
| 57         | Hradec nad Svitavou     | compost            | 30.09405                                | 9241536348                         | 1.204E+09                             | 73526769815        | 2.0555                | 0.714667                           | 7.11 | 0.128 | 1.364 | 0.036 | 0.369787                         | 2.110667                                           | 2.896                                             | 1.375556                |
| 58         | Hradec nad Svitavou     | compost            | 29.32517                                | 17583900574                        | 1.109E+09                             | 69708973568        | 2.4205                | 0.714333                           | 7.41 | 0.137 | 1.437 | 0.034 | 0.430955                         | 2.438                                              | 2.689666667                                       | 1.102521                |
| 59         | Hradec nad Svitavou     | compost            | 27.72282                                | 2.82036E+14                        | 2.537E+09                             | 72658897631        | 2.5015                | 0.72                               | 7.57 | 0.14  | 1.48  |       |                                  |                                                    |                                                   |                         |
